# Supplementary material for: Tunnel-structured Na0.54Mn0.50Ti0.51O2and Na0.54Mn0.50Ti0.51O2/C nanorods as advanced cathode materials for sodium-ion batteries
Source: Royal Society of Chemistry journal article supplement (doi:10.1039/c5cc02233a), 2015-01-01
Supplement: c5cc02233a1.pdf [file c5cc02233a1.pdf]

## Supporting Information

# Tunnel-structured $\text{Na}_{0.54}\text{Mn}_{0.50}\text{Ti}_{0.51}\text{O}_2$ and $\text{Na}_{0.54}\text{Mn}_{0.50}\text{Ti}_{0.51}\text{O}_2/\text{C}$ nanorods as advanced cathode materials for sodium-ion batteries

Xiaolei Jiang <sup>[a]</sup>, Shuo Liu <sup>[a]</sup>, Huayun Xu <sup>[a]</sup>, Liang Chen <sup>[a]</sup>, Jian Yang <sup>\*[a]</sup>, and Yitai Qian <sup>[a, b]</sup>

<sup>[a]</sup> School of Chemistry and Chemical Engineering, Shandong University, Jinan, 250100, P. R. China.

<sup>[b]</sup> Hefei National Laboratory for Physical Science at Microscale, Department of Chemistry, University of Science and Technology of China, Hefei, 230026, P.R. China

## Experimental Section

### *Synthesis Method*

$\text{Na}_{0.54}\text{Mn}_{0.50}\text{Ti}_{0.51}\text{O}_2$  nanorods were synthesized by a modified molten salt method. First, appropriate amounts of  $\text{NaCH}_3\text{COO}$ ,  $\text{Mn}(\text{CH}_3\text{COOH})_2$ , and  $\text{TiO}_2$  (Sinopharm, AR) were dissolved in droplets of deionized water and added to a mixture of  $\text{NaCl-KCl}$  (molar ratio = 0.59:0.41, total mass = 1 g). The mixture was mixed in a mortar, transferred to an alumina crucible, and dried at 180 °C for 3 h. The powders were then ground for another 20 min, then heated to 800 °C at a rate of 2 °C  $\text{min}^{-1}$  in air. After stayed at 800 °C for 10 h, the powders were cooled to room temperature at a rate of 3 °C  $\text{min}^{-1}$ . The obtained product was thoroughly washed with deionized water to remove the salts, dried at 60 °C in a vacuum oven overnight. The obtained sample was named as NMTO. For the carbon coating experiment, the powder was mixed with 50 wt% citric acid by ball-milling and heated treated at 400 °C for 4 h under a flow of  $\text{Ar}(95\%)/\text{H}_2(5\%)$ . The final black powder was  $\text{Na}_{0.54}\text{Mn}_{0.50}\text{Ti}_{0.51}\text{O}_2/\text{C}$  composite, marked as NMTO/C. All the powders were collected for structural characterization and electrochemical measurements. The specific surface areas of NMTO and NMTO/C are 16.3 and 22.0  $\text{m}^2 \text{g}^{-1}$ , based on Brunauer-Emmett-Teller (BET) model.

### *Structural Characterization*

X-ray powder diffraction (XRD) pattern of the product was recorded on a Bruker D8 advance X-ray diffractometer with Cu K $\alpha$  line as a radiation ( $\lambda=1.5418$  Å). SEM, TEM and HRTEM images were achieved from a scanning electron microscope (JSM-7600F, Japan), a transmission electron microscope (JEM-1011, Japan) and an analytic transmission electron microscope (JEOL-2100, Japan). The molar ratio of Na, Mn and Ti was determined by inductively coupled plasma-atomic emission spectroscopy (ICP–AES, IRIS Intrepid II XSP, USA). The carbon content of NMTO/C was obtained from a Mettler Toledo TGA/SDTA851 thermal analyzer. Raman spectrum was recorded by a NEXUS 670 FT-IR Raman spectrometer with an excitation wavelength of 632 nm.

### *Electrochemical measurements*

The working electrode was prepared by a recipe of 10 wt.% polyvinylidene fluoride (PVDF), 20 wt.% acetylene black and 70 wt.% active material (NMTO and NMTO/C) in N-methylpyrrolidinone (NMP). The slurry based on the above recipe was bladed on aluminum foil and dried in vacuum at 80 °C. The resulting film was roll-pressed and punched into the discs with a diameter of 12 mm. These discs typically have active material of  $\sim 1.8$  mg cm $^{-2}$ . The tap densities of NMTO and NMTO/C are 1.82 and 1.79 g cm $^{-3}$ , respectively. The discs were assembled together with a Na metal foil as the counter electrode, a glass fiber as the separator and 1 M NaClO $_4$  in a mixture of EC-DEC (1:1 volume) as the electrolyte in an argon-filled glove box. Cyclic voltammograms (CV) was acquired from an LK2005A electrochemical workstation between 2 and 4.2 V versus Na $^+$ /Na at a scan rate of 0.1 mV s $^{-1}$ . As to C-rate, 140 mA g $^{-1}$  is assumed to be 1 C.

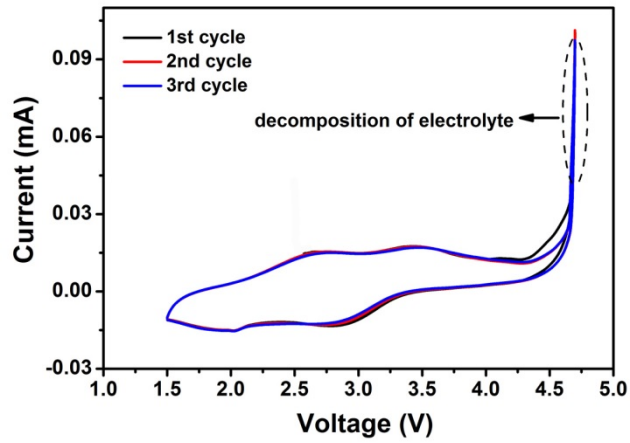

**Figure S1.** The CV curves of NMTO nanorods between 2.0-4.7 V at a scan rate of 0.1  $\text{mV s}^{-1}$ .

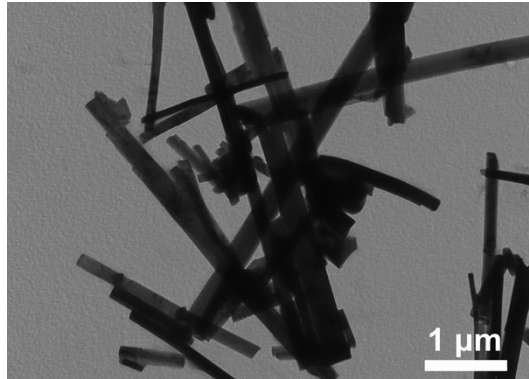

**Figure S2.** The TEM image of NMTO/C nanorods.

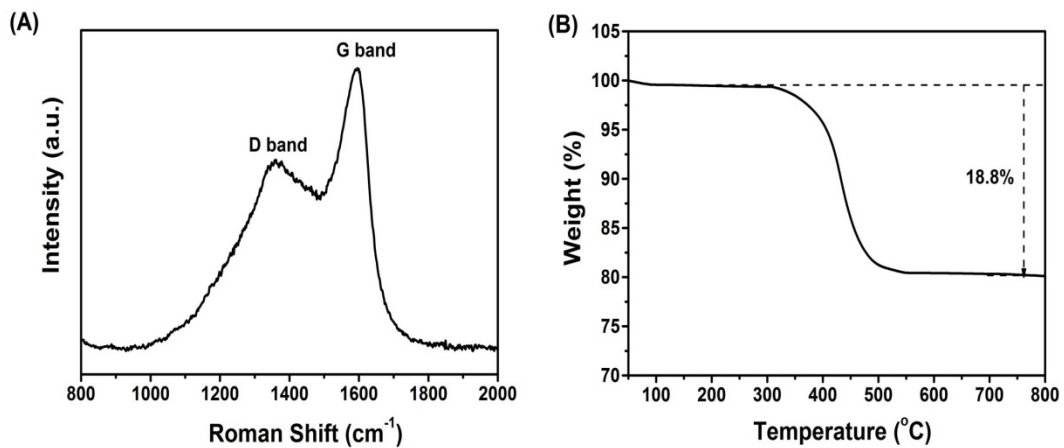

**Figure S3.** (A) Raman spectrum and (B) TG curve of NMTO/C nanorods. TG measurement was carried out at a heating rate of 10  $^{\circ}\text{C min}^{-1}$  in air.

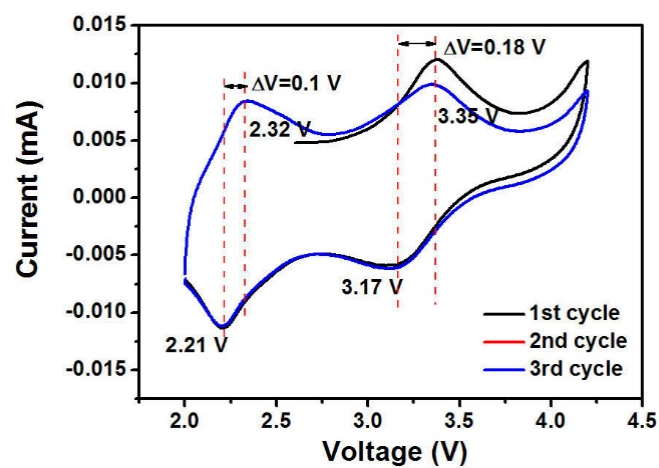

**Fig. S4** CV curves of  $\text{Na}_{0.54}\text{Mn}_{0.50}\text{Ti}_{0.51}\text{O}_2/\text{C}$ .

**Table 1.** Lattice parameters of  $\text{Na}_{0.54}\text{Mn}_{0.50}\text{Ti}_{0.51}\text{O}_2$  Nanorods after Rietveld refinement

| Phase                         | $\text{Na}_4\text{Mn}_4\text{Ti}_5\text{O}_{18}$ |
|-------------------------------|--------------------------------------------------|
| Crystal system                | Orthorhombic                                     |
| Space group                   | Pbam (55)                                        |
| Lattice constants:            |                                                  |
| a (Å)                         | 9.1817(4)                                        |
| b (Å)                         | 26.4451(5)                                       |
| c (Å)                         | 2.8746(7)                                        |
| Cell volume (Å <sup>3</sup> ) | 698.01                                           |
| $R_B$                         | 3.92%                                            |
| $R_{wp}$                      | 5.14%                                            |
| $\chi^2$                      | 1.13                                             |
